# Supplementary material
Source: PubMed Central journal article supplement (PMC5634743)
Supplement: NIHMS908461-supplement-Supplemental.pdf [file NIHMS908461-supplement-Supplemental.pdf]

## Exosomes Mediate Epithelium-Mesenchyme Crosstalk in Organ Development

Nan Jiang<sup>1,2</sup>, Lusai Xiang<sup>2,5</sup>, Ling He<sup>2,5</sup>, Guodong Yang<sup>2</sup>, Jinxuan Zheng<sup>2,5</sup>, Chenglin Wang<sup>2,6</sup>, Yimei Zhang<sup>3</sup>, Sainan Wang<sup>2</sup>, Yue Zhou<sup>2</sup>, Tzong-Jen Sheu<sup>7</sup>, Jiaqian Wu<sup>8</sup>, Kenian Chen<sup>8</sup>, Paulo G. Coelho<sup>9</sup>, Nicky M. Tovar<sup>9</sup>, Shin Hye Kim<sup>2</sup>, Mo Chen<sup>2\*</sup>, Yan-Heng Zhou<sup>3\*</sup>, Jeremy J. Mao<sup>2,4,10,11\*</sup>

<sup>1</sup> Central Laboratory, Department of Orthodontics, Peking University School & Hospital of Stomatology, 22 Zhongguancun Nandajie, Beijing 100081, China

<sup>2</sup> Center for Craniofacial Regeneration, Columbia University, 630 W. 168 St., New York, NY 10032, USA

<sup>3</sup> Department of Orthodontics, Peking University School & Hospital of Stomatology, 22 Zhongguancun Nandajie, Beijing 100081, China

<sup>4</sup> Department of Biomedical Engineering, Columbia University, New York, NY 10027

<sup>5</sup> Guanghua School of Stomatology, Sun Yat-sen University, Guangzhou, China, 510055

<sup>6</sup> State Key Laboratory of Oral Diseases, Sichuan University, Chengdu 610041, China

<sup>7</sup> Department of Orthopaedics, University of Rochester School of Medicine, Rochester, NY 14642

<sup>8</sup> The Vivian L. Smith Department of Neurosurgery, University of Texas, Houston, TX 77054

<sup>9</sup> Department of Biomaterials and Biomimetics, New York University, New York, New York 10010

<sup>10</sup> Department of Orthopedic Surgery, Columbia University, New York, NY 10032

<sup>11</sup> Department of Pathology and Cell Biology, Columbia University, New York, NY 10032

### **Correspondence and requests for materials should be addressed to**

Jeremy J. Mao

Professor and Edwin S. Robinson Endowed Chair

Columbia University

630 W. 168 St. – PH7E

New York, NY 10032

Phone: 212-305-4475

Fax: 212-342-0199

Email: [jmao@columbia.edu](mailto:jmao@columbia.edu)

### **Co-Corresponding authors**

Jeremy J. Mao

Professor and Edwin S. Robinson Endowed Chair

Columbia University

630 W. 168 St. – PH7E

New York, NY 10032

Phone: 212-305-4475

Fax: 212-342-0199

Email: [jmao@columbia.edu](mailto:jmao@columbia.edu)

Dr. Yanheng Zhou

Department of Orthodontics, Peking University School & Hospital of Stomatology

22 Zhongguancun Nandajie, Haidian District, Beijing 100081, P.R. China

Tel: 86-10-82195381;

Fax: 86-10-62173402

E-mail: [yanhengzhou@gmail.com](mailto:yanhengzhou@gmail.com)

Mo Chen, PhD

Research Scientist

Center for Craniofacial Regeneration

Columbia University

630 W. 168 St. – VC12-211

New York, NY 10032

Phone: 212-305-4475

Fax: 212-342-0199

Email: [chenmo999@hotmail.com](mailto:chenmo999@hotmail.com)

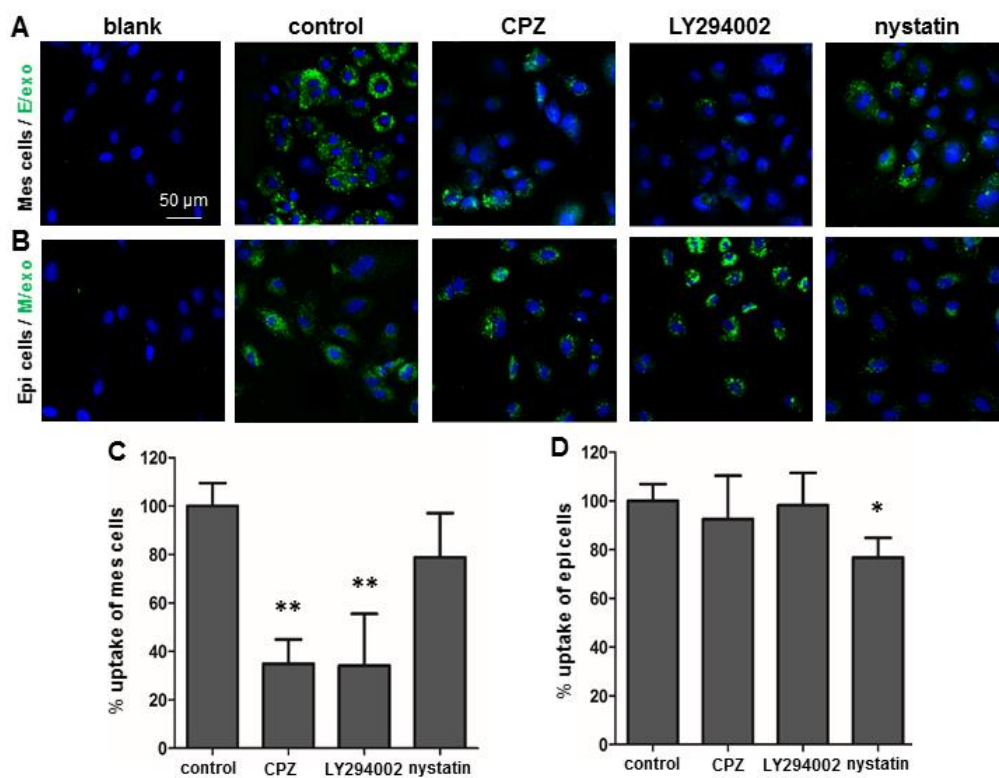

**Supplementary Figure S1.** (A and B) Different endocytosis pathways of epithelium and mesenchyme cells. Immunofluorescence images of dental mesenchymal cells pretreated with PBS (blank), DMSO (control), 10  $\mu$ M CPZ, 50  $\mu$ M LY294002 for 30 min and 5  $\mu$ M nystatin for 120 min, were incubated with labeled epithelium derived exosomes (2  $\mu$ g/ml) except blank group at 37  $^{\circ}$ C for 6 h. (C and D) Exosomes uptake efficiency by recipient cells under various treatments, which is quantified by endocytosis positive cells. The values are normalized to the control. n=6; \*P<0.05, \*\*P<0.01 (one-way ANOVA). All the scale bars are 50  $\mu$ m.

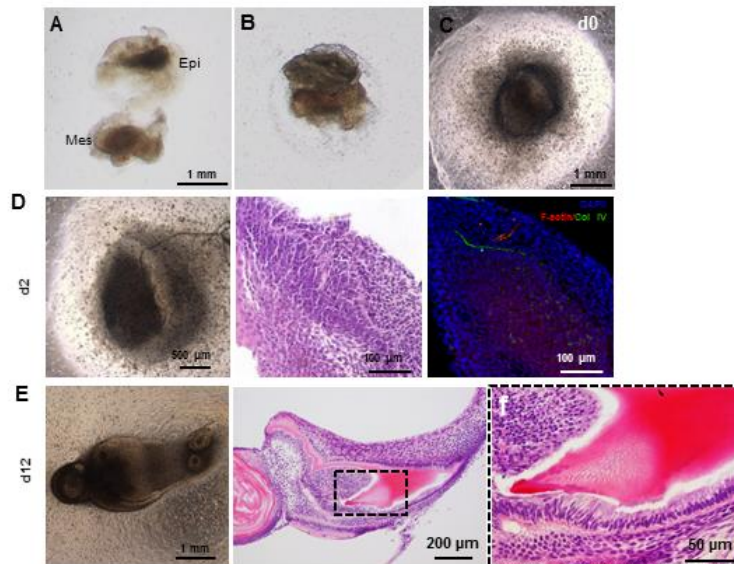

**Supplementary Figure S2.** Reconstituted epithelium and mesenchyme led to a regenerated tooth organ. (A) E16.5 tooth germs digested to remove basement membrane, and separate epithelium (Epi) and mesenchyme (Mes). Epi and Mes reconstituted (B) and cultured in a modified Trowell-type organ culture model (C). (D) Epithelium and mesenchyme attached, with basement membrane components detected by day 2 in immunofluorescence: Col IV (green), F-actin (red) and DAPI (blue). (E) A tooth organ formed in 12 days by reconstituted Epi and Mes tissues, similar to a native late-bell stage tooth germ. H&E staining of 12-day reconstituted tooth organ with dentin formation, cusp structure and polarized ameloblasts and odontoblasts showing in the enlargement area.

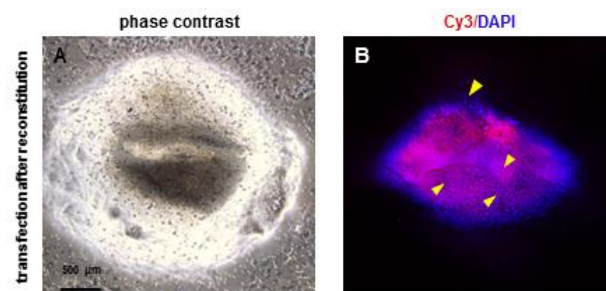

**Supplementary Figure S3.** The siRNA transfection efficiency in reconstituted tooth organ. (A) Phase contrast image of a reconstituted tooth organ at day 1 in the presence of Cy3. (B) Cy3 (red) transfected into reconstituted tooth organ with DAPI staining (blue).

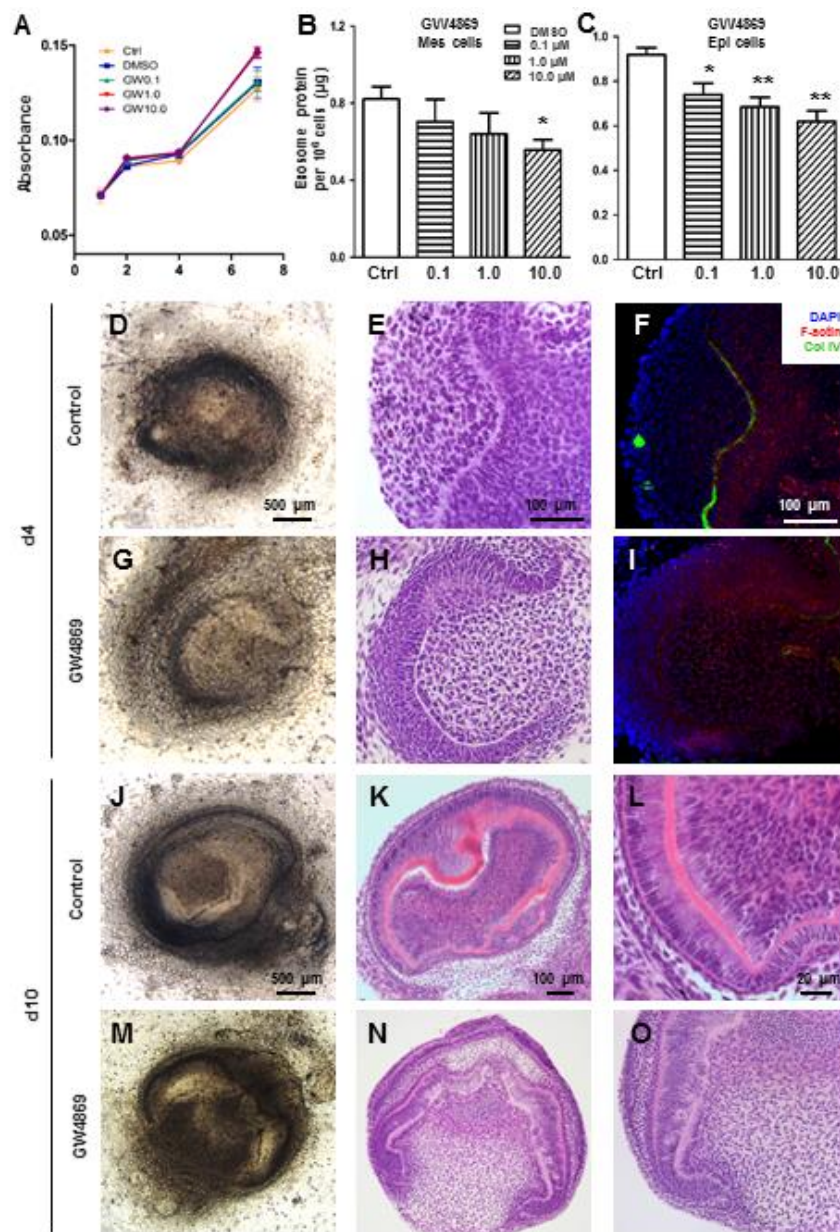

**Supplementary Figure S4.** Attenuation of exosomal secretion by GW4869 causes epithelium-mesenchyme dysmorphogenesis. (A) Proliferation of mesenchyme cells unaffected by GW4869 in the observed 12 days. (B and C) Exosomal protein secretion decreased to ~70% at 10 µg/ml in postnatal 4-5 day mesenchyme (Mes) and epithelium (Epi) cells. (mean±s.d.; four independent experiments). \*P<0.05, \*\*P<0.01 (one-way ANOVA). Epithelium and mesenchyme tissues isolated from E16.5 tooth germs and reconstituted. (D) By day 4, the reconstituted tooth organ formed a basement membrane (E) that was positive for Col IV (F). (G-I) GW4869 at 10 µM attenuated basement membrane formation, with virtual absence of Col IV (I). (J and K) By day 10, the reconstituted tooth organ formed a tooth crown-like structure with dentin formation (L). (M-O) GW4869 virtually abolished dentin mineralization by day 10.

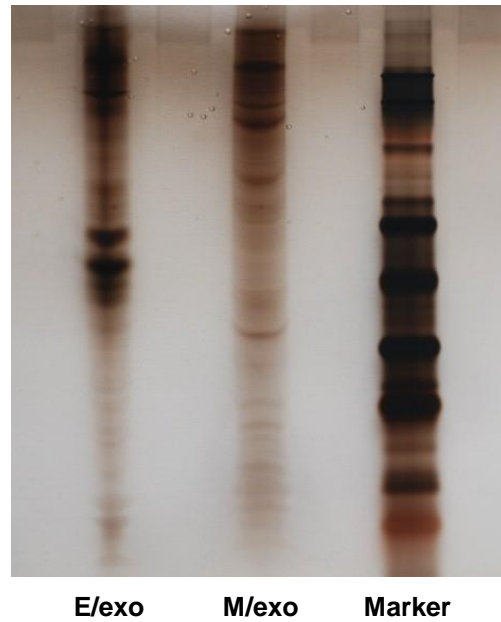

**Supplementary Figure S5.** Exosomal proteins. Proteins extracted from epithelium exosomes (E/exo) and mesenchyme exosomes (M/exo) loaded onto a 4-12% SDS-PAGE gel, followed by silver staining and mass spectrometry.

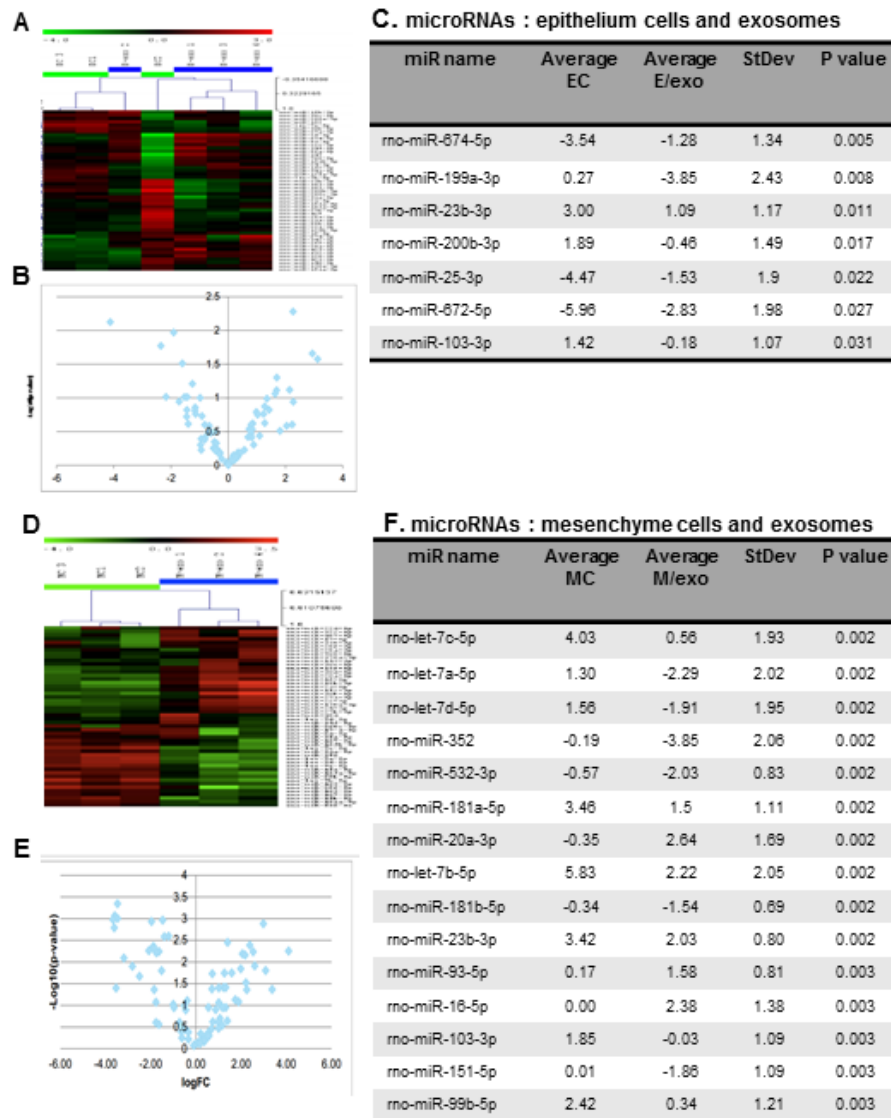

**Supplementary Figure S6.** miRNAs differentially expressed from those in their parent cells by statistical significance. (A, D) Heat map of microRNA profiles differentially expressed by epithelium/mesenchyme cells and exosomes. (B, E) The volcano plot shows the relation between the p-values and the ddCp of epithelium/mesenchyme cells and exosomes. (C, F) List of microRNAs that significantly differential expressed between parent cells and exosomes.

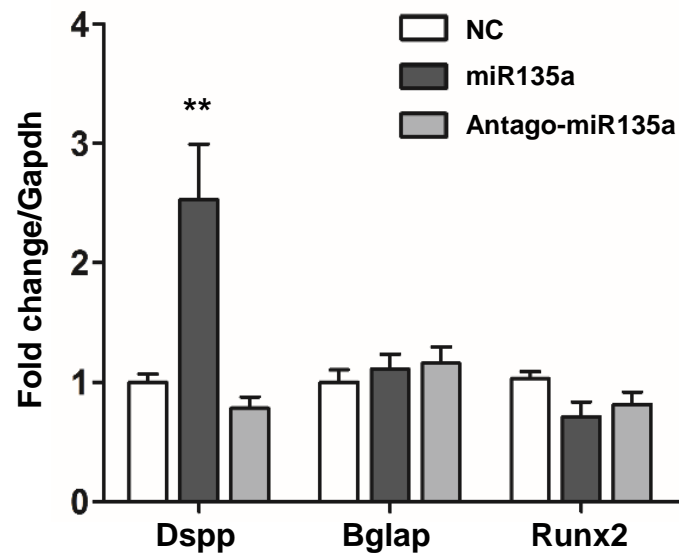

**Supplementary Figure S7.** mRNA expression of Dsp, Bglap and Runx2 of mesenchymal cells transfected with miRNA mimic, miR135a or Antago-miR135a. (mean $\pm$ s.d.; four independent experiments) \*\*P < 0.01 (one-way ANOVA and LSD test).

**Supplementary Table S1.** Epithelium and mesenchyme exosome proteins (separate Word files)

| <b>1) Epi &lt;20KD</b>                                                                                      |              |
|-------------------------------------------------------------------------------------------------------------|--------------|
| <b>Rat Protein Identified</b>                                                                               | <b>MW(D)</b> |
| histone H4 [Homo sapiens]                                                                                   | 11360        |
| transgelin-2 [Rattus norvegicus]                                                                            | 22550        |
| albumin, isoform CRA_a [Rattus norvegicus]                                                                  | 53060        |
| cofilin-1 [Rattus norvegicus]                                                                               | 18749        |
| phosphatidylethanolamine-binding protein 1 [Rattus norvegicus]                                              | 20902        |
| connective tissue growth factor [Rattus norvegicus]                                                         | 13386        |
| actin, alpha skeletal muscle [Homo sapiens]                                                                 | 42366        |
| destrin [Rattus norvegicus]                                                                                 | 18807        |
| PREDICTED: uncharacterized protein LOC679994 [Rattus norvegicus]                                            | 73760        |
| Chain A, Crystal Structure Of A Mammalian 2-Cys Peroxiredoxin, Hbp23.                                       | 22250        |
| ribosomal protein P2=iron-binding protein [rats, liver, Peptide Partial, 12 aa, segment 3 of 4]             | 1242         |
| peptidyl-prolyl cis-trans isomerase A [Rattus norvegicus]                                                   | 18091        |
| histone H2A type 4 [Rattus norvegicus]                                                                      | 14275        |
| peroxiredoxin-2 [Rattus norvegicus]                                                                         | 21941        |
| rCG45615, isoform CRA_d [Rattus norvegicus]                                                                 | 8201         |
| 40S ribosomal protein S18 [Mus musculus]                                                                    | 17708        |
| actin related protein 2/3 complex, subunit 3 (predicted), isoform CRA_a [Rattus norvegicus]                 | 19864        |
|                                                                                                             |              |
| <b>2) Epi 20-40KD</b>                                                                                       |              |
| actin, cytoplasmic 1 [Homo sapiens]                                                                         | 42052        |
| pro1 collagen type III [Rattus norvegicus]                                                                  | 62863        |
| aldose reductase-related protein 2 [Rattus norvegicus]                                                      | 36510        |
| aldose reductase [Rattus norvegicus]                                                                        | 36230        |
| procollagen, type 1, alpha 1, isoform CRA_a [Rattus norvegicus]                                             | 72112        |
| annexin A2 [Rattus norvegicus]                                                                              | 38939        |
| Similar to 14-3-3 protein sigma [Rattus norvegicus]                                                         | 28698        |
| triosephosphate isomerase [Rattus norvegicus]                                                               | 27417        |
| nucleolar protein B23.2 [Rattus norvegicus]                                                                 | 28482        |
| histone (H1d) [Rattus norvegicus]                                                                           | 21832        |
| glyceraldehyde 3-phosphate-dehydrogenase [Rattus norvegicus]                                                | 36098        |
| unnamed protein product [Rattus rattus]                                                                     | 34350        |
| lipocortin I [Rattus sp.]                                                                                   | 39137        |
| 14-3-3 protein epsilon [Homo sapiens]                                                                       | 29326        |
| RecName: Full=Heat shock protein beta-1; Short=HspB1; AltName: Full=Heat shock 27 kDa protein; Short=HSP 27 | 22936        |
| 14-3-3 protein eta [Mus musculus]                                                                           | 28365        |
| odontogenic ameloblast-associated protein precursor [Rattus norvegicus]                                     | 30424        |
| translation elongation factor 1-delta subunit [Rattus norvegicus]                                           | 5176         |
| histone cluster 1, H1b [Rattus norvegicus]                                                                  | 22635        |
| PREDICTED: uncharacterized protein LOC679994 [Rattus norvegicus]                                            | 73760        |
| ribosomal protein S4                                                                                        | 29892        |
| heat shock protein 90 [Rattus sp.]                                                                          | 83606        |



|                                                                                                        |        |
|--------------------------------------------------------------------------------------------------------|--------|
| 14-3-3 protein theta [Mus musculus]                                                                    | 28046  |
| 14-3-3 zeta isoform [Rattus norvegicus]                                                                | 27955  |
| unnamed protein product [Rattus norvegicus]                                                            | 70670  |
| brain alpha-tropomyosin (TMBr-1) [Rattus norvegicus]                                                   | 32547  |
| uncharacterized protein LOC364814 [Rattus norvegicus]                                                  | 28047  |
|                                                                                                        |        |
| <b>3) Epi 40-50KD</b>                                                                                  |        |
| actin, cytoplasmic 2 [Homo sapiens]                                                                    | 42108  |
| unnamed protein product [Rattus norvegicus]                                                            | 47428  |
| laminin, gamma 2 precursor [Rattus norvegicus]                                                         | 134651 |
| aldolase A [Rattus norvegicus]                                                                         | 39691  |
| elongation factor-1 alpha [Rattus norvegicus]                                                          | 50460  |
| rCG31394, isoform CRA_b [Rattus norvegicus]                                                            | 51370  |
| amelin 1 [Rattus norvegicus]                                                                           | 43455  |
| hemiferrin, transferrin-like protein [Rattus norvegicus]                                               | 24874  |
| serine (or cysteine) proteinase inhibitor, clade E, member 2, isoform CRA_b [Rattus norvegicus]        | 35647  |
| serum albumin precursor [Rattus norvegicus]                                                            | 70710  |
| elongation factor 1-gamma [Rattus norvegicus]                                                          | 50371  |
| Chain A, Rat Liver S-Adenosylhomocystein Hydrolase                                                     | 47889  |
| Chain E, Crystal Structures Of Rat Anionic Trypsin Complexed With The Protein Inhibitors Appi And Bpti | 24467  |
| odontogenic ameloblast-associated protein precursor [Rattus norvegicus]                                | 30424  |
| tubulin alpha                                                                                          | 50894  |
| ruvB-like 1 [Mus musculus]                                                                             | 50524  |
| Sept11 protein [Mus musculus]                                                                          | 49219  |
| multifunctional protein ADE2 [Rattus norvegicus]                                                       | 47807  |
| tubulin beta-5 chain [Mus musculus]                                                                    | 50095  |
| CaBP1 [Rattus norvegicus]                                                                              | 47590  |
| follistatin-related protein 1 precursor [Rattus norvegicus]                                            | 35740  |
| serine protease HTRA1 precursor [Rattus norvegicus]                                                    | 52210  |
| histone H4 [Homo sapiens]                                                                              | 11360  |
|                                                                                                        |        |
| <b>4) Epi 50-100KD</b>                                                                                 |        |
| laminin, gamma 2 precursor [Rattus norvegicus]                                                         | 134651 |
| dnaK-type molecular chaperone hsp72-ps1 - rat                                                          | 71112  |
| 78 kDa glucose-regulated protein precursor [Rattus norvegicus]                                         | 72473  |
| heat shock protein HSP 90-beta [Mus musculus]                                                          | 83571  |
| heat shock protein HSP 90-alpha [Rattus norvegicus]                                                    | 85161  |
| endoplasmic precursor [Rattus norvegicus]                                                              | 92998  |
| laminin, beta 3 precursor [Rattus norvegicus]                                                          | 132908 |
| transitional endoplasmic reticulum ATPase [Rattus norvegicus]                                          | 89977  |
| RecName: Full=Nucleolin; AltName: Full=Protein C23                                                     | 77158  |
| periostin, osteoblast specific factor (predicted), isoform CRA_b [Rattus norvegicus]                   | 77990  |
| alpha actinin [Rattus norvegicus]                                                                      | 102899 |
| alpha-actinin-1 [Rattus norvegicus]                                                                    | 103466 |

|                                                                                                      |        |
|------------------------------------------------------------------------------------------------------|--------|
| PREDICTED: putative uncharacterized protein C8orf73-like [Rattus norvegicus]                         | 78414  |
| myosin-9 [Rattus norvegicus]                                                                         | 227566 |
| elongation factor 2 [Rattus norvegicus]                                                              | 96192  |
| actin, alpha skeletal muscle [Homo sapiens]                                                          | 42366  |
| <b>5) Epi &gt;100KD</b>                                                                              |        |
| similar to Laminin alpha-3 chain precursor (Nicein alpha subunit), isoform CRA_b [Rattus norvegicus] | 192602 |
| laminin-5 alpha 3 chain [Rattus norvegicus]                                                          | 192555 |
| laminin, beta 3 precursor [Rattus norvegicus]                                                        | 132908 |
| laminin, gamma 2 precursor [Rattus norvegicus]                                                       | 134651 |
| tenascin-N precursor [Rattus norvegicus]                                                             | 174967 |
| fibronectin 1, isoform CRA_d [Rattus norvegicus]                                                     | 266235 |
| rCG55184, isoform CRA_a [Rattus norvegicus]                                                          | 171938 |
| filamin, alpha (predicted), isoform CRA_b [Rattus norvegicus]                                        | 279491 |
| collagen alpha-1(VII) chain precursor [Rattus norvegicus]                                            | 259785 |
| thrombospondin 1 precursor [Rattus norvegicus]                                                       | 133579 |
| procollagen, type XII, alpha 1, isoform CRA_b [Rattus norvegicus]                                    | 310201 |
| <b>6) Mes &lt;20KD</b>                                                                               |        |
| histone H4 [Homo sapiens]                                                                            | 11360  |
| albumin, isoform CRA_a [Rattus norvegicus]                                                           | 53060  |
| peptidyl-prolyl cis-trans isomerase B precursor [Rattus norvegicus]                                  | 22845  |
| PREDICTED: uncharacterized protein LOC679994 [Rattus norvegicus]                                     | 73760  |
| rCG45615, isoform CRA_d [Rattus norvegicus]                                                          | 8201   |
| histone H2A type 1-C [Homo sapiens]                                                                  | 14097  |
| ribosomal protein P2=iron-binding protein [rats, liver, Peptide Partial, 12 aa, segment 3 of 4]      | 1242   |
| vimentin, partial [Rattus norvegicus]                                                                | 8971   |
| dermcidin preproprotein [Homo sapiens]                                                               | 11391  |
| cofilin-1 [Rattus norvegicus]                                                                        | 18749  |
| <b>7) Mes 20-40KD</b>                                                                                |        |
| Collagen alpha1 [Rattus norvegicus]                                                                  | 138828 |
| pro1 collagen type III [Rattus norvegicus]                                                           | 62863  |
| PREDICTED: uncharacterized protein LOC684681 [Rattus norvegicus]                                     | 21304  |
| actin, cytoplasmic 1 [Homo sapiens]                                                                  | 42052  |
| annexin II [Rattus sp.]                                                                              | 39236  |
| collagen alpha-2(I) chain precursor [Rattus norvegicus]                                              | 129999 |
| tropomyosin beta chain [Mus musculus]                                                                | 32931  |
| histone cluster 1, H1b [Rattus norvegicus]                                                           | 22635  |
| <b>8) Mes 40-60KD</b>                                                                                |        |
| 78 kDa glucose-regulated protein precursor [Rattus norvegicus]                                       | 72473  |
| heat shock cognate 71 kDa protein [Rattus norvegicus]                                                | 71055  |
| lactadherin isoform 2 precursor [Rattus norvegicus]                                                  | 48522  |

|                                                                                      |        |
|--------------------------------------------------------------------------------------|--------|
| procollagen C-endopeptidase enhancer 1 precursor [Rattus norvegicus]                 | 50837  |
| M2 pyruvate kinase [Rattus norvegicus]                                               | 58314  |
| serpin H1 precursor [Rattus norvegicus]                                              | 46602  |
| protein disulfide-isomerase A4 precursor [Rattus norvegicus]                         | 73103  |
| grp75 [Rattus sp.]                                                                   | 73984  |
| PREDICTED: putative uncharacterized protein C8orf73-like [Rattus norvegicus]         | 78414  |
| elongation factor-1 alpha [Rattus norvegicus]                                        | 50460  |
| pigment epithelium-derived factor precursor [Rattus norvegicus]                      | 46493  |
| beta-hexosaminidase subunit beta precursor [Rattus norvegicus]                       | 61888  |
| serum albumin precursor [Rattus norvegicus]                                          | 70710  |
| protein disulfide-isomerase A3 precursor [Rattus norvegicus]                         | 57010  |
|                                                                                      |        |
| <b>9) Mes 60-100KD</b>                                                               |        |
| periostin, osteoblast specific factor (predicted), isoform CRA_d [Rattus norvegicus] | 90879  |
| tenascin-N precursor [Rattus norvegicus]                                             | 174967 |
| heat shock protein HSP 90-beta [Mus musculus]                                        | 83571  |
| endoplasmic precursor [Rattus norvegicus]                                            | 92998  |
| heat shock protein HSP 90-alpha [Rattus norvegicus]                                  | 85161  |
| RecName: Full=Nucleolin; AltName: Full=Protein C23                                   | 77158  |
| filamin, alpha (predicted), isoform CRA_b [Rattus norvegicus]                        | 279491 |
| procollagen-lysine, 2-oxoglutarate 5-dioxygenase 2, long variant [Rattus norvegicus] | 87527  |
| transitional endoplasmic reticulum ATPase [Rattus norvegicus]                        | 89977  |
| histone (H1d) [Rattus norvegicus]                                                    | 21832  |
| elongation factor 2 [Rattus norvegicus]                                              | 96192  |
| keratin, type II cytoskeletal 5 [Rattus norvegicus]                                  | 62060  |
| PREDICTED: keratin, type II cytoskeletal 6A-like isoform 1 [Rattus norvegicus]       | 59735  |
| actin, alpha skeletal muscle [Homo sapiens]                                          | 42366  |
| procollagen, type XII, alpha 1, isoform CRA_b [Rattus norvegicus]                    | 310201 |
| lactadherin isoform 2 precursor [Rattus norvegicus]                                  | 48522  |
|                                                                                      |        |
| <b>10) Mes &gt;100KD</b>                                                             |        |
| PREDICTED: collagen alpha-1(XII) chain [Rattus norvegicus]                           | 333977 |
| tenascin-N precursor [Rattus norvegicus]                                             | 174967 |
| tenascin N (predicted) [Rattus norvegicus]                                           | 88723  |
| AE binding protein 1 (predicted) [Rattus norvegicus]                                 | 116181 |
| fibronectin 1, isoform CRA_d [Rattus norvegicus]                                     | 266235 |
| filamin, alpha (predicted), isoform CRA_b [Rattus norvegicus]                        | 279491 |
| Tln1 protein [Rattus norvegicus]                                                     | 163474 |
| periostin, osteoblast specific factor (predicted), isoform CRA_b [Rattus norvegicus] | 77990  |
| laminin, gamma 1 [Rattus norvegicus]                                                 | 175782 |
| PREDICTED: laminin subunit beta-1, partial [Rattus norvegicus]                       | 202701 |
| thrombospondin 2 precursor [Rattus norvegicus]                                       | 133522 |
